# Supplementary material for: Acidic Environment Leads to ROS-Induced MAPK Signaling in Cancer Cells
Source: PubMed Central journal article supplement (PMC3144229; doi:10.1371/journal.pone.0022445), 2011-07-26
Supplement: pone.0022445.s002.pdf [file pone.0022445.s002.pdf]

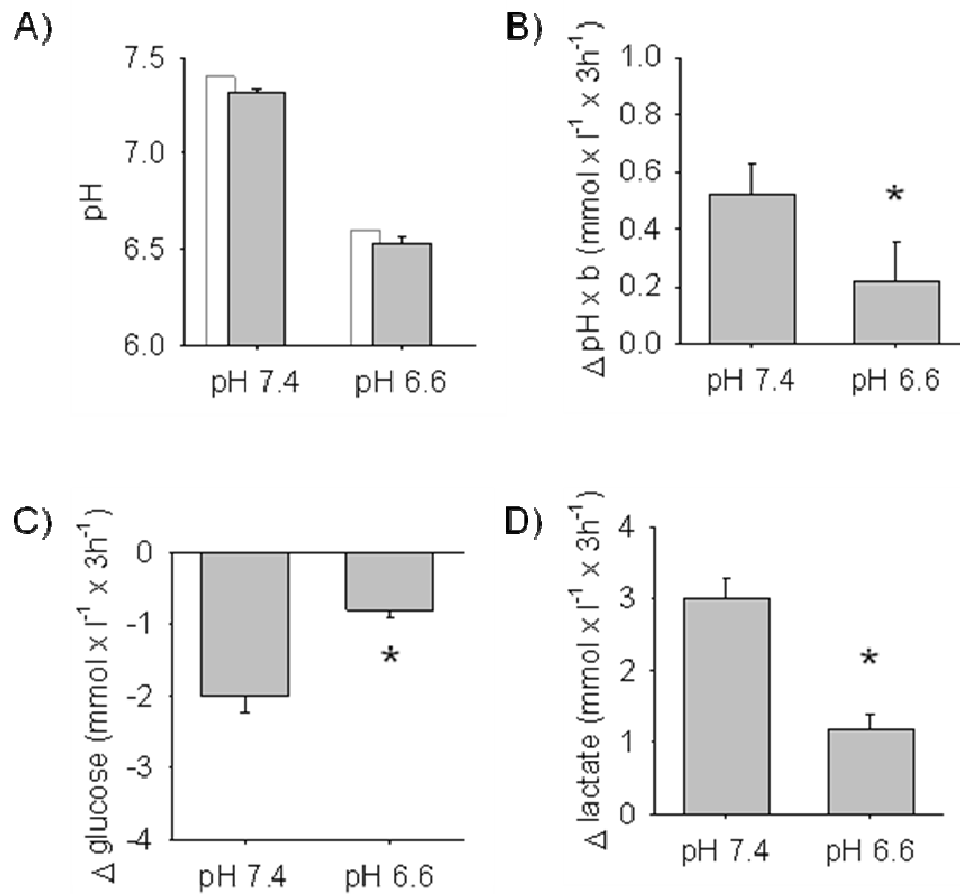

**Figure S2.** Glycolysis-induced alteration of media parameters. "H<sup>+</sup>-production" (A and B) as well as changes in the concentration of glucose (C) and lactate (D) within 3 h under control (pH 7.4) and acidic (pH 6.6) conditions (in 1 ml Ringer solution) were determined. AT1 cells were incubated with Ringer solutions for 3h and parameters were determined as mentioned. N = 10. The cell number ( $1.9 \pm 0.1$  million cells per petri dish) did not differ significantly between the groups and was not affected during the three hour incubation period. Therefore the concentrations can be compared directly. (\*)  $p < 0.05$ .
