# Supplementary material for: Acidic Environment Leads to ROS-Induced MAPK Signaling in Cancer Cells
Source: PubMed Central journal article supplement (PMC3144229; doi:10.1371/journal.pone.0022445), 2011-07-26
Supplement: pone.0022445.s003.pdf [file pone.0022445.s003.pdf]

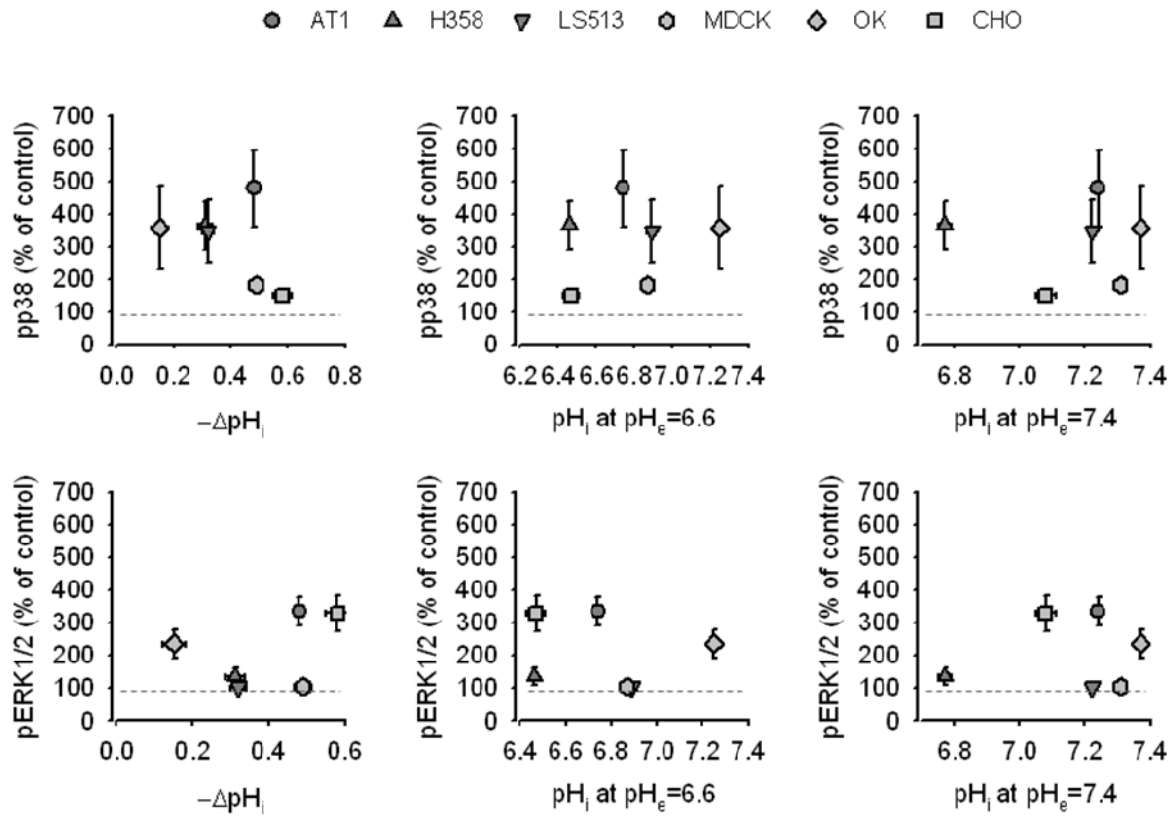

**Figure S3.** Acidosis-induced MAPK activation in different cell types. No significant correlation between changes in  $\text{pH}_i$  or absolute  $\text{pH}_i$  and ERK1/2 or p38 phosphorylation in different cell types.
