# Supplementary material for: Acidic Environment Leads to ROS-Induced MAPK Signaling in Cancer Cells
Source: PubMed Central journal article supplement (PMC3144229; doi:10.1371/journal.pone.0022445), 2011-07-26
Supplement: pone.0022445.s004.pdf [file pone.0022445.s004.pdf]

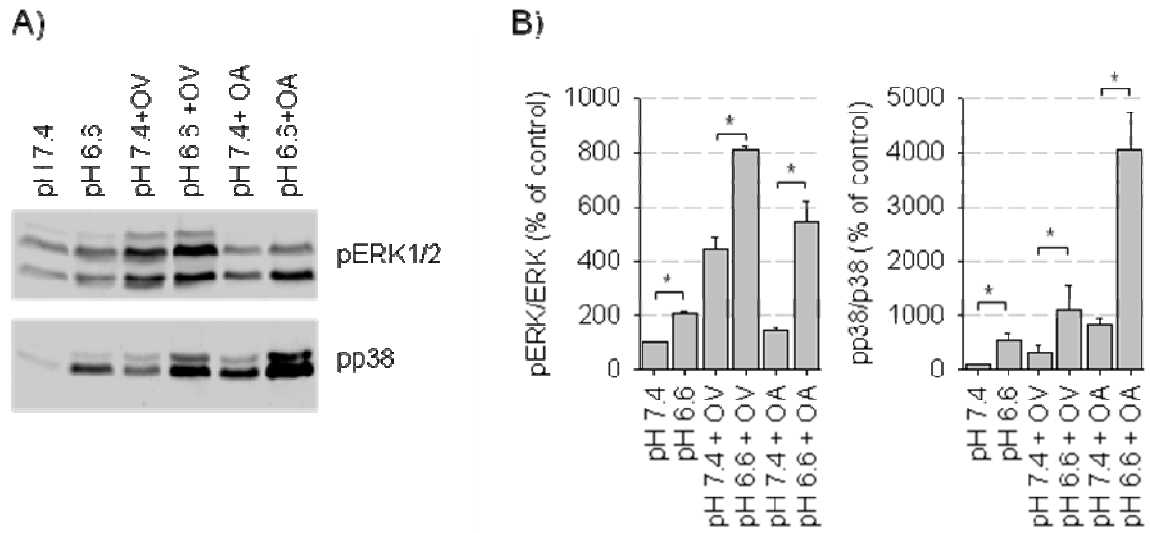

**Figure S4.** Phosphatases do not mediate the effect of acidosis. Inhibition of phosphatases by oocadaic acid (100 nM) or orthovanadate (100  $\mu$ M) enhanced ERK1/2 and p38 phosphorylation per se. Acidosis exerted an additive effect on phosphorylation. (\*)  $p < 0.05$ . N= 4-6.
