# Supplementary material for: Acidic Environment Leads to ROS-Induced MAPK Signaling in Cancer Cells
Source: PubMed Central journal article supplement (PMC3144229; doi:10.1371/journal.pone.0022445), 2011-07-26
Supplement: pone.0022445.s006.pdf [file pone.0022445.s006.pdf]

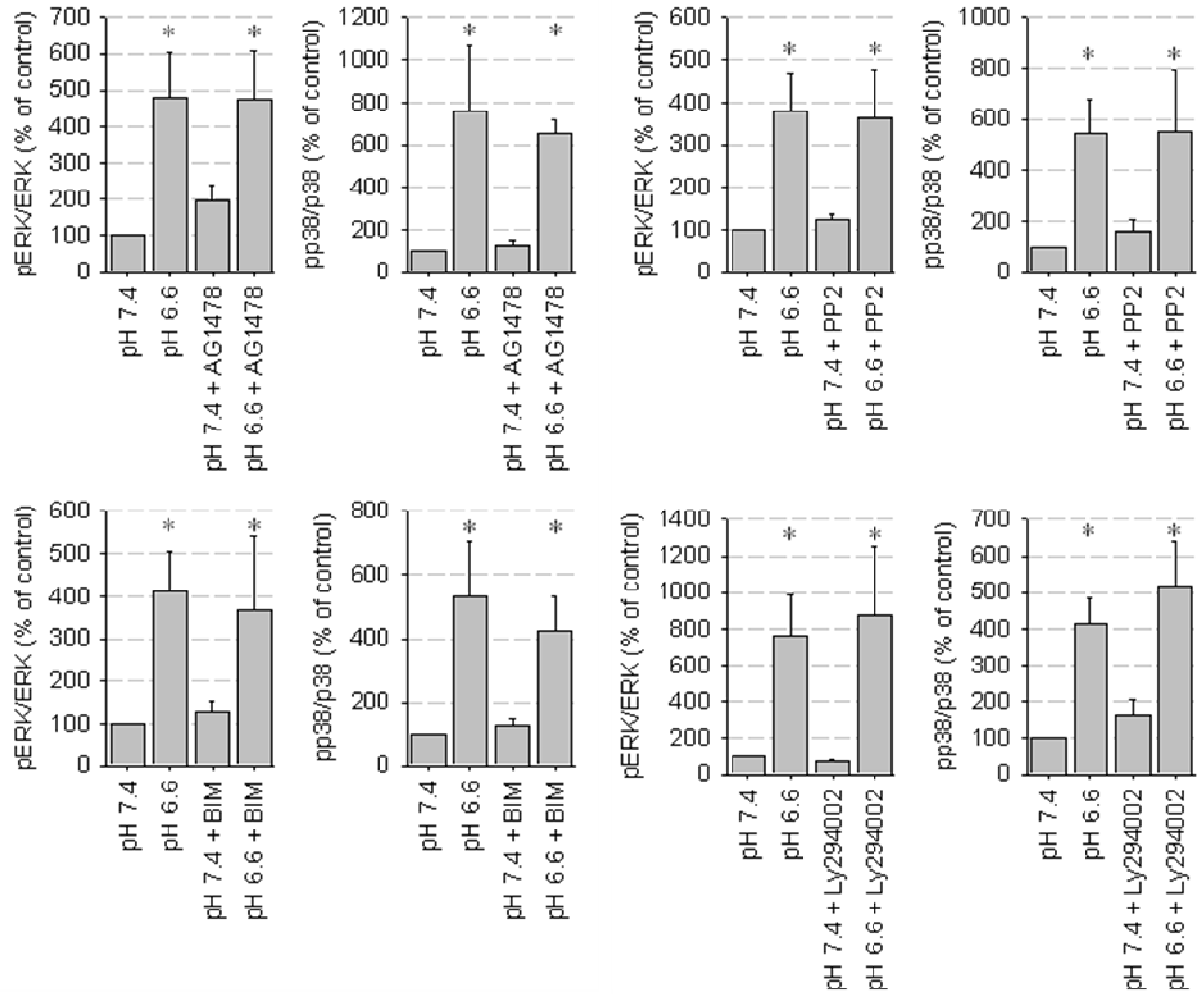

**Figure S6.** Effect of kinase inhibitors on acidosis-induced MAPK phosphorylation. 1  $\mu$ M AG1478 (EGFR kinase), 1  $\mu$ M PP2 (Src-kinas), 1  $\mu$ M BIM (protein kinase C), 10  $\mu$ M Ly294002 (PI3-kinase). Values represent phosphorylated protein divided by total protein and normalized to HEPES-HCO<sub>3</sub><sup>-</sup>-Ringer pH 7.4. (\*) p<0.05 versus pH 7.4. N=5-8.
