# Supplementary material for: Acidic Environment Leads to ROS-Induced MAPK Signaling in Cancer Cells
Source: PubMed Central journal article supplement (PMC3144229; doi:10.1371/journal.pone.0022445), 2011-07-26
Supplement: pone.0022445.s007.pdf [file pone.0022445.s007.pdf]

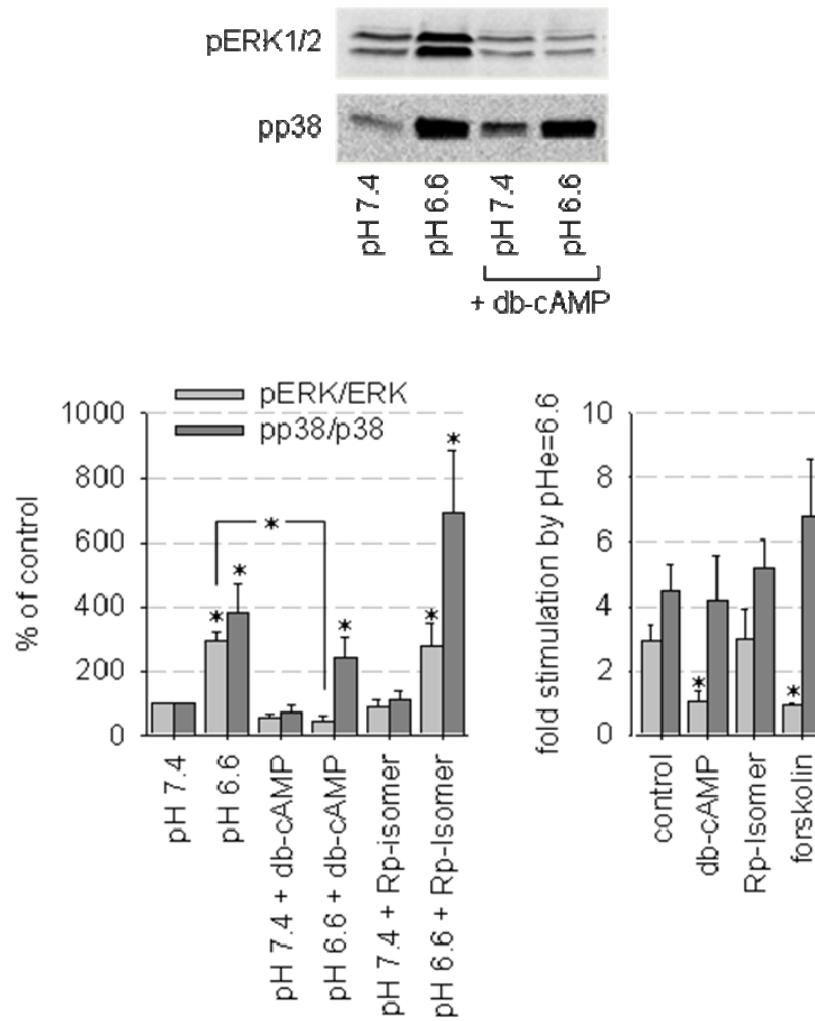

**Figure S7.** The role of cAMP in MAPK activation. Addition of cAMP (300  $\mu$ M db-cAMP) or stimulation of cAMP formation (3  $\mu$ M forskolin) prevented ERK1/2 but not p38 phosphorylation. The inactive cAMP analogue Rp-Isomer (300  $\mu$ M) did not affect ERK1/2 or p38 phosphorylation. (\*)  $p < 0.05$  versus pH 7.4. N=5-7.
